# Supplementary material
Source: Springer Nature journal article supplement (https://www.springermedizin.de/resource/supplementary/12877_2014_1072_MOESM16_ESM.pdf/9440756)

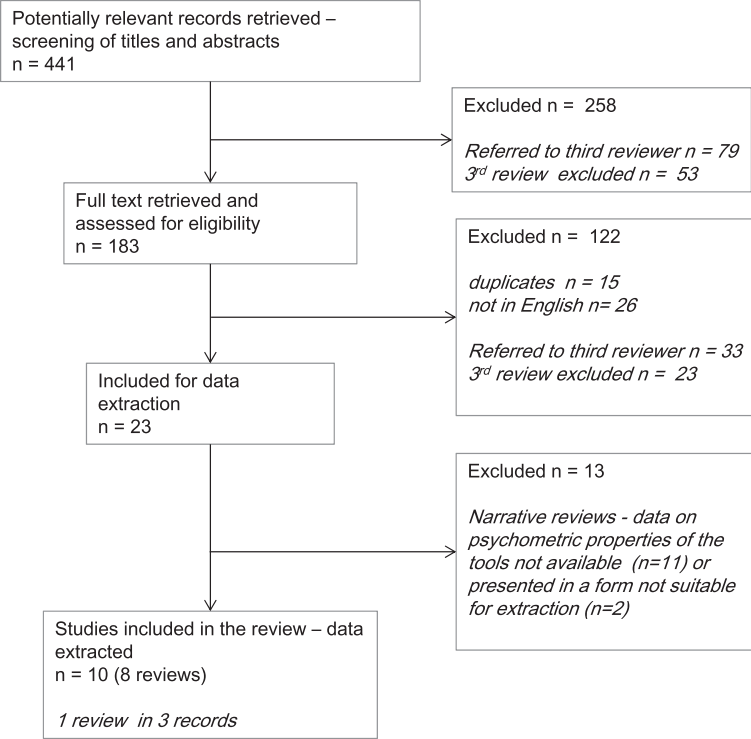

Supplement: MOESM16 [file 9440756]
